# Supplementary material for: Hidden Chief Technology Officers: the surfacing of a subterranean organizational role
Source: Springer Nature journal article supplement (doi:10.1186/s40604-018-0050-z), 2018-04-12
Supplement: MOESM1 [file 15655506]

## (Hidden) Chief Technology Officers: the Surfacing of a Subterranean Organizational Role

Bertram Lohmüller, Alexander Petrikhin, Norbert Wagemann

### المديرين الفنيين (المتخفين) بروز دور تنظيمي من الأعماق

يركز بحثنا على "الفنيين المتخفين" (الإطارات الذين يساهمون في نجاعة تسيير المهام ذات الطابع التكنولوجي بالرغم من انه ليس لديهم خطة وظيفية رسمية ذات علاقة بالمهام التكنولوجية على عكس الإطارات الذين يشغلون خطة وظيفية رسمية

المجال التكنولوجي).

تقدم هذه الورقة تحليل البيانات المجمعة من عدد من الإطارات في مجال الأعمال التجارية الدولية، وبالتحديد دراسة أنشطتهم الفنية الرئيسية، مجالات مسؤولياتهم وكيف تؤثر الأطراف الرئيسية المتدخلة على "قدرتهم في التسيير" داخل وخارج المنظمات والشركات. حصلنا على النتائج التجريبية لهذا البحث عبر دراسة مشروع المجموعة الدولية "الاستخدام الذكي للكتلة الحيوية على طول نهر الدانوب: تشكيل شبكة بحث وتنمية مع الألمان، الهنغاريين، الجمهورية السلوفاكية والشريك الروماني". تظهر النتائج الأولى وجود علاقة قوية بين الأولويات العملية للمدير الفني و تفاصيل مختلف قطاعات الأعمال وابتكاراتها المستعملة في هذه القطاعات.

الكلمات المفتاح : المدير الفني، المدير الفني المتخفي، الأطراف الداخلية والخارجية، مصادر التأثير في التنظيم، لابتكار المفتوح.
